# Supplementary material for: Coral histology reveals consistent declines in tissue integrity during a marine heatwave despite differences in bleaching severity
Source: PeerJ journal article supplement (doi:10.7717/peerj.18654), 2025-01-03

*Montipora capitata*

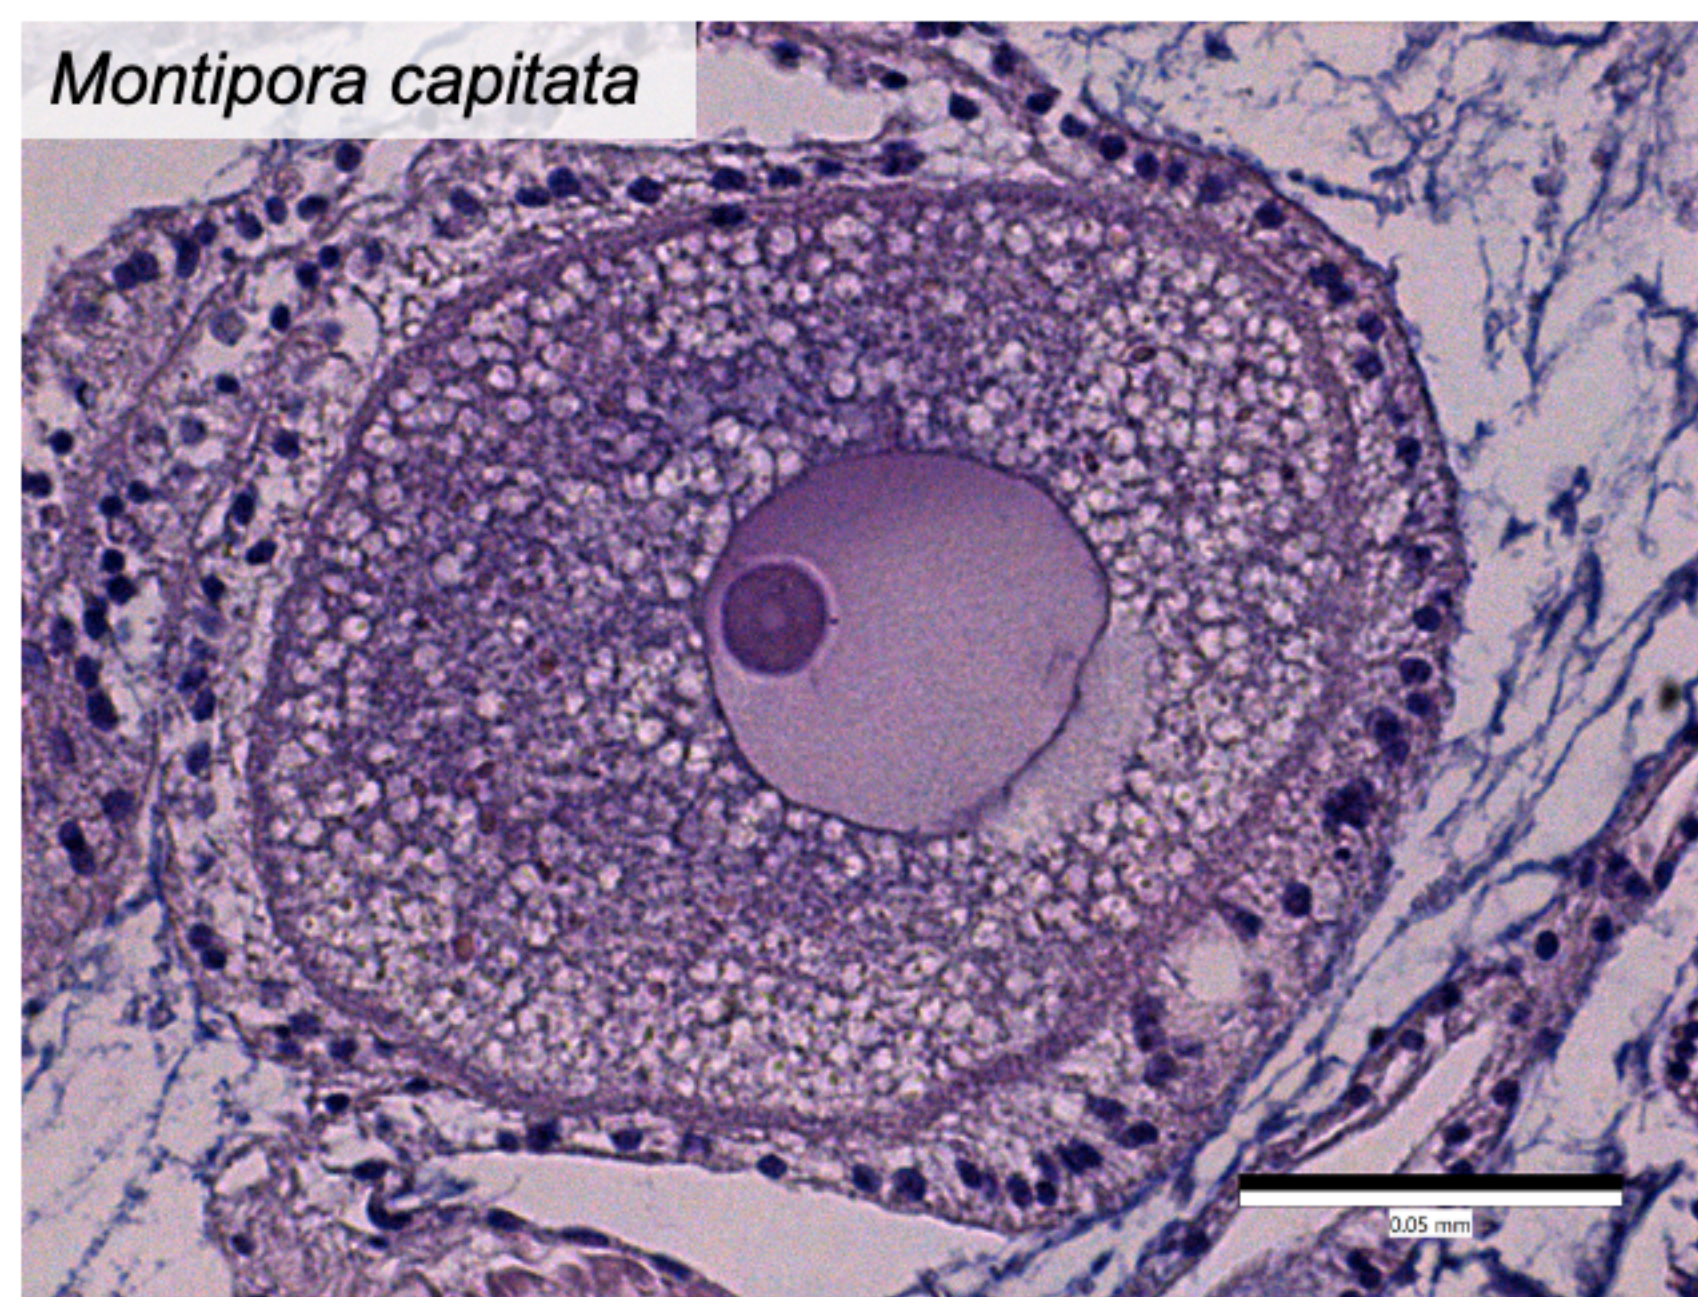

*Porites compressa*

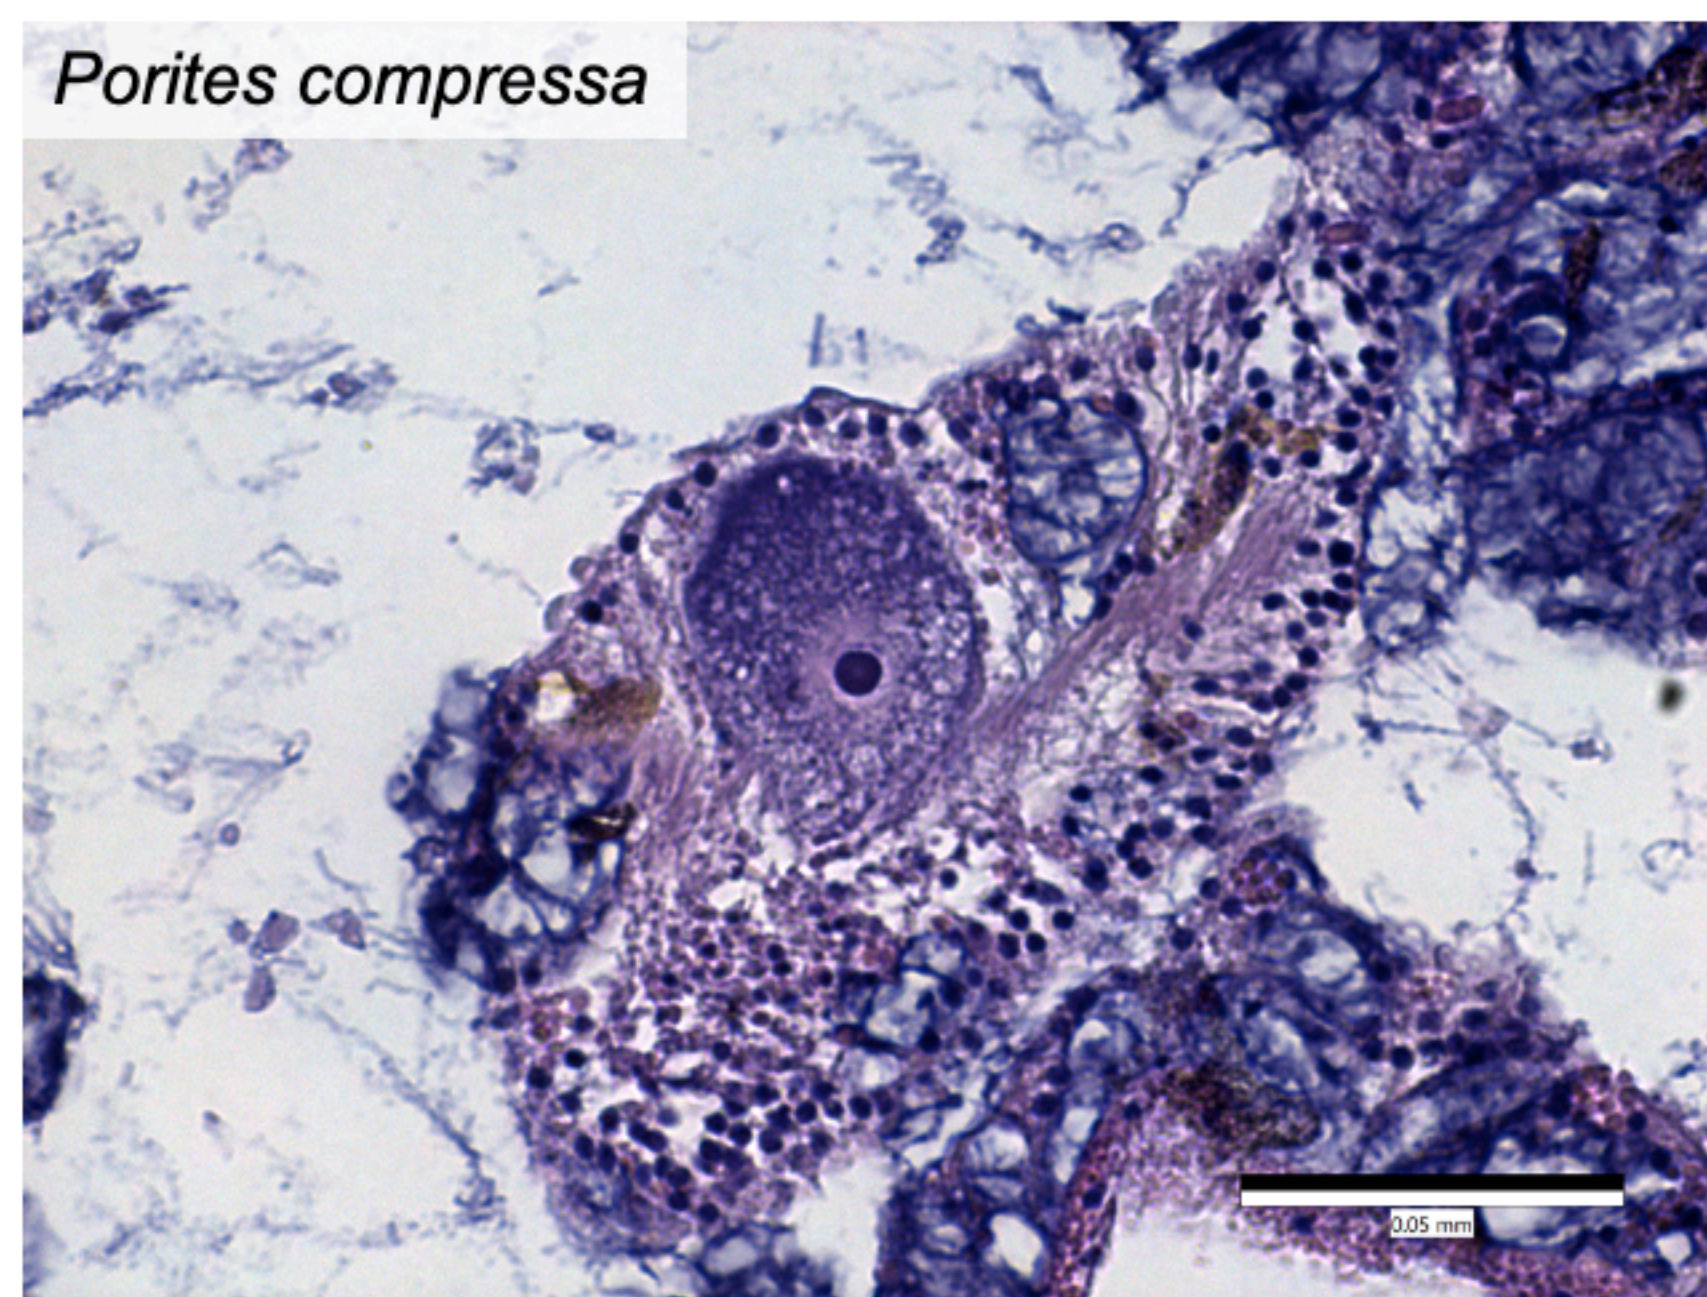

Supplement: Supplemental1.pdf [file Supplemental1.pdf]
